# Supplementary material
Source: MDPI journal article supplement (https://www.mdpi.com/2673-9976/20/1/15)
Supplement: s1 [file s1 › blsf-2099166-supplementary.pdf]

# Analysis of *Lavandula angustifolia* compounds obtained by different extraction types by GC-MS technique

I.R. Suica-Bunghez, R.M. Senin, R. Stoica

National Research&amp; Development Institute for Chemistry and Petrochemistry ICECHIM, Spl. Independentei nr. 202, 6thDistrict, 060021, Bucharest, Romania

## Introduction

*Lavandula angustifolia* is a medicinal plant with important benefits for human body, having antimicrobial and antioxidants activities. Scientific data detailed the fact that lavender extract presented favorable characteristics to health, such as being antibacterial, antifungal, antidepressive or anticancer properties.

The aim of this study was to establish the efficiency of extraction methods by identification and determination of compounds extracted from lavender plant. It were used different types of extraction: ultrasound (50°C/2hrs) and magnetic agitation (ambient temp./24hrs), in pure ethanol and hydroalcoholic mixture (ethanol:ultrapure water=50:50 v/v).

## Methodology

It was utilised a GC-MS chromatograph equipment for detection and quantitative determination of lavender compounds extracted (ex. eucalyptol, linalool, camphor, terpinenol, linalylacetat, etc), an Elite-5MS (5% diphenyl methyl polysiloxane stationary phase) column and a linalool standard. Were established the optimal GC-MS separation parameters.

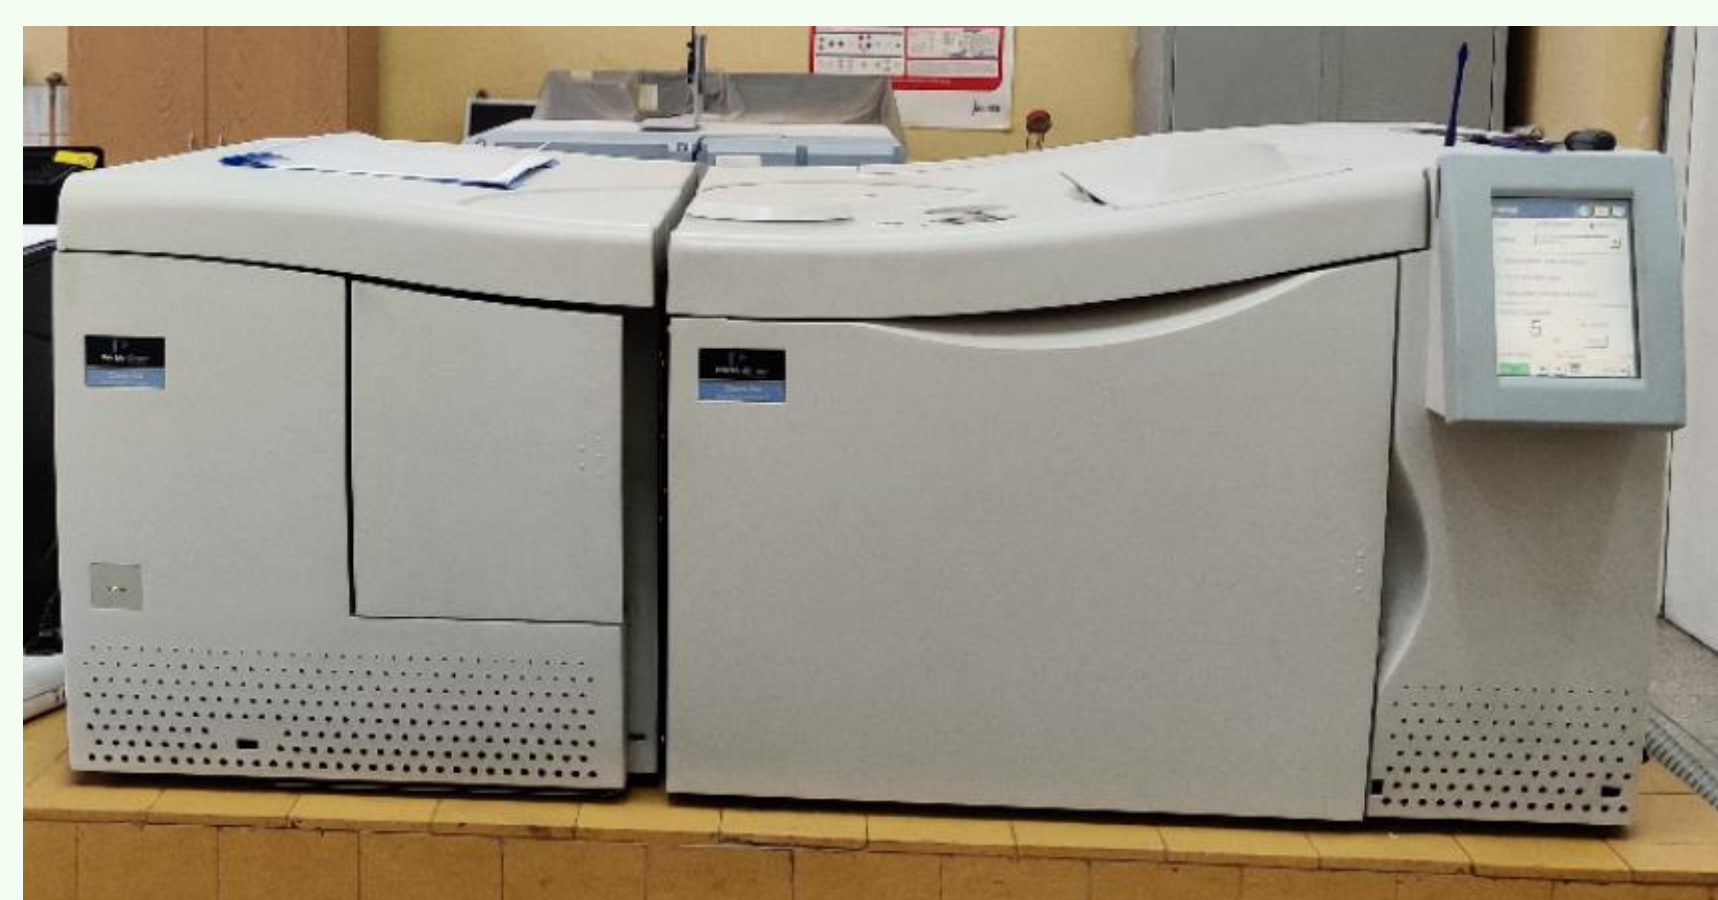

GC-MS Perkin Elmer

| Gas chromatograph parameters                          |                                                |
|-------------------------------------------------------|------------------------------------------------|
| Injection mode                                        | Split                                          |
| Injection port temperature                            | 200 °C                                         |
| Injection volume                                      | 2 µl                                           |
| Column: - stationary phase                            | Elite-5MS (5% diphenyl methyl polysiloxane)    |
| - size                                                | 60 m x 0.32 mm x 0.25 µm film thickness        |
| - temp. program                                       | 60 °C (10 min.),<br>2 °C/min, to 180 °C, 5 min |
| Carrier gas                                           | helium, constant flow = 1 mL/min               |
| Mass-spectrometer parameters                          |                                                |
| Ion source temperature                                | 230 °C                                         |
| GC-MS interface temperature                           | 250 °C                                         |
| Energy electrons                                      | 70 eV                                          |
| Electronic Impact (EI) ion source in acquisition mode | TIC                                            |
| Multiplier                                            | 500 eV                                         |
| Library                                               | NIST Mass Spectral Library                     |

## Conclusions

In conclusion, it was observed that lavender sample extracted in ethanol, thru magnetic aggitation, at room temperature is a more efficient method than the others, because it were observed more compounds (over 20) than in the others laveder extracts samples (approx. 15)

Quantitative determination of the identified compounds was performed by internal standardization with response factors considered equal to unity.

## Results

1g lavender

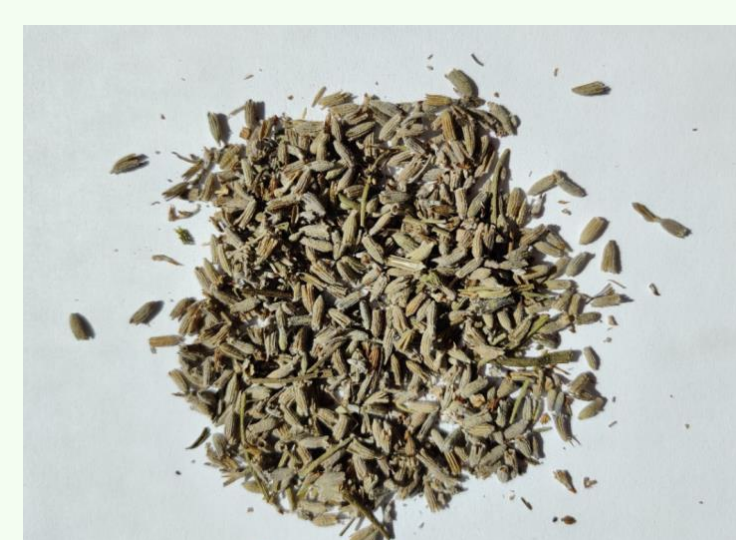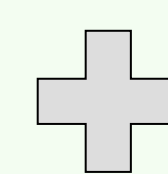

| Sample/<br><i>Lavandula angustifolia</i> | Extraction method      | Extraction solvent | Temp (°C) | Time (h) |
|------------------------------------------|------------------------|--------------------|-----------|----------|
| L1                                       | Magnetic agitation (M) | EtOH               | 20        | 24       |
| L2                                       | Magnetic agitation     | Hydroalc. mixture  | 20        | 24       |
| L3                                       | Ultrasound bath (U)    | EtOH               | 50        | 2        |
| L4                                       | Ultrasound bath        | Hydroalc. mixture  | 50        | 2        |

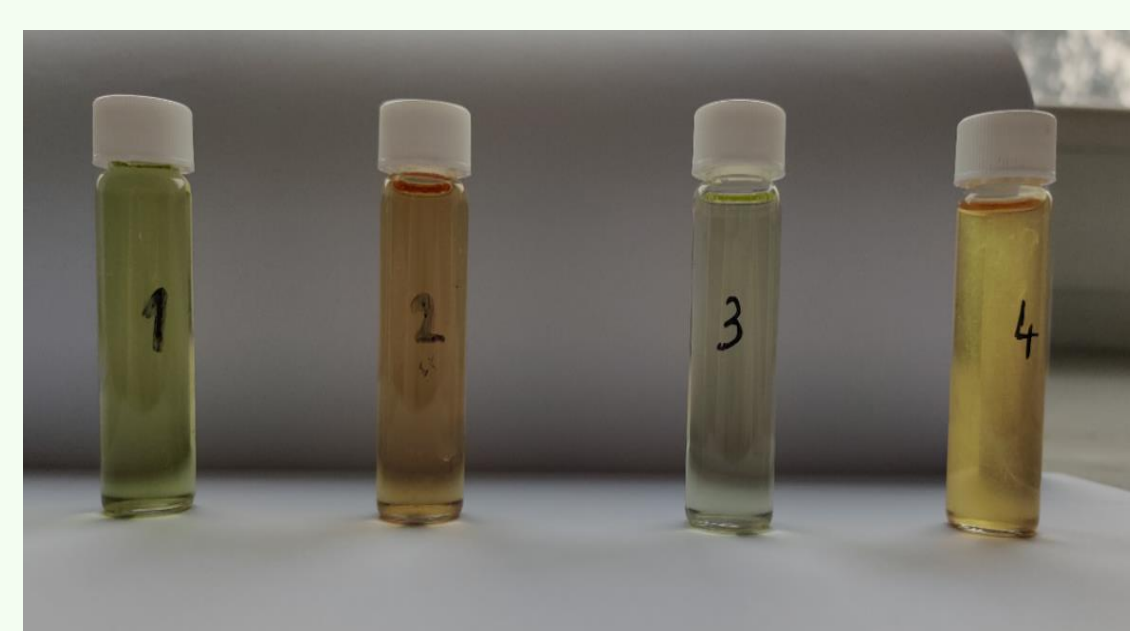

Lavender extract solutions

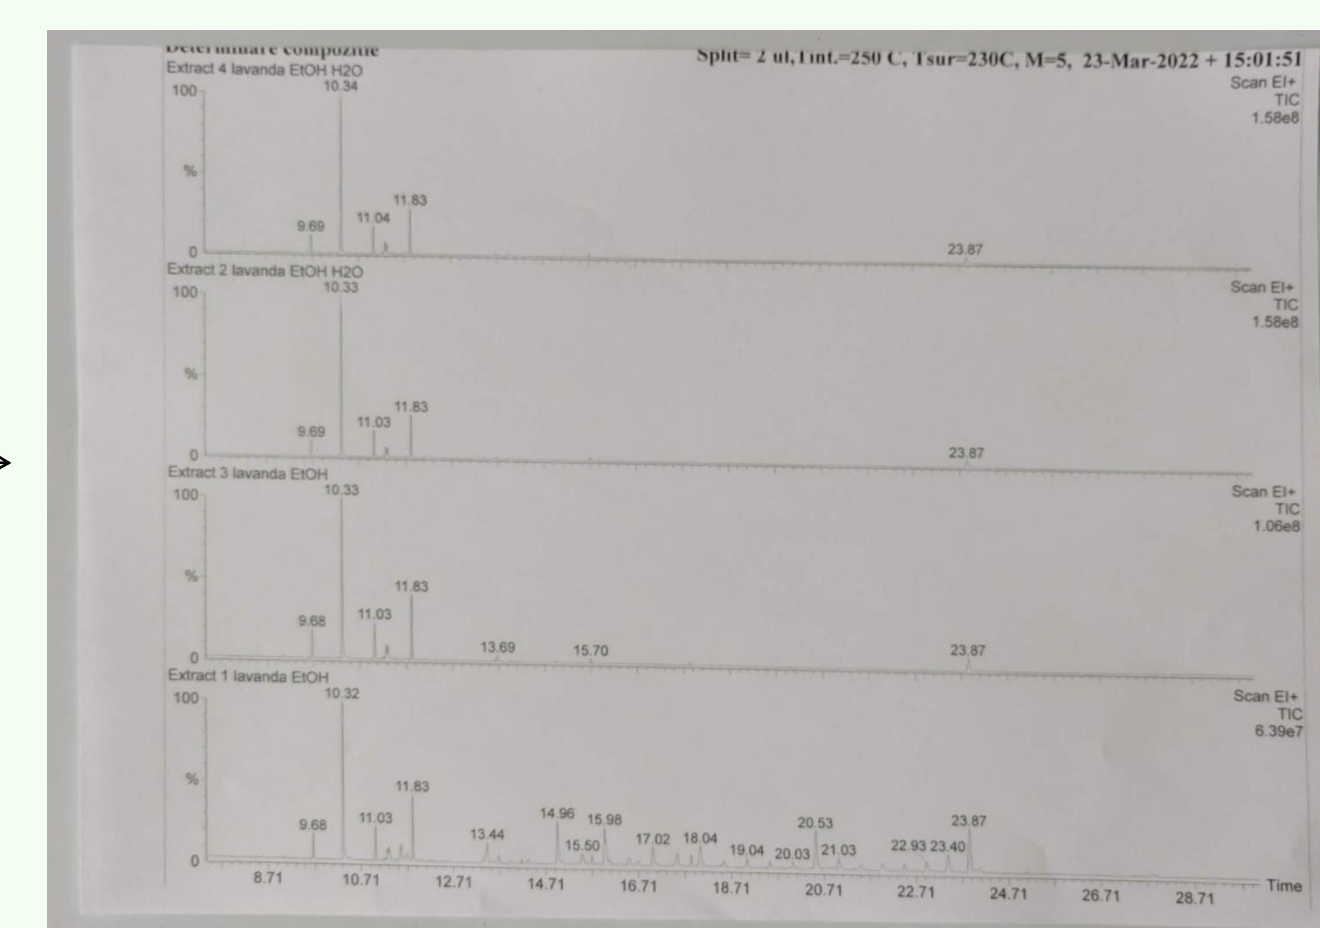

GC-MS chromatogram

| No. | tR (min) | Identified compounds                               | Conc. %   |           |           |           |
|-----|----------|----------------------------------------------------|-----------|-----------|-----------|-----------|
|     |          |                                                    | Extract 1 | Extract 2 | Extract 3 | Extract 4 |
| 1   | 9.660    | Eucalyptol                                         | 2.41      | 5.41      | 7.33      | 7.25      |
| 2   | 10.306   | Linalool                                           | 17.33     | 51.77     | 45.10     | 51.59     |
| 3   | 11.011   | 2-Bornanone                                        | 3.44      | 9.22      | 9.73      | 9.45      |
| 4   | 11.226   | Butanoic acid, hexyl ester                         | 0.26      | 0.55      | 0.79      | 0.73      |
| 5   | 11.271   | Endo-borneol                                       | 1.43      | 3.81      | 4.01      | 3.95      |
| 6   | 11.331   | Terpinen-4-ol                                      | 1.58      | 3.40      | 4.30      | 3.77      |
| 7   | 11.551   | Hexanedioic acid, bis(2-ethylhexyl) ester          | 2.52      | 0.49      | 0.29      | 0.55      |
| 8   | 11.696   | Hexanedioic acid, bis(2-ethylhexyl) ester (izomer) | 1.20      |           | 0.28      | 0.22      |
| 9   | 11.811   | Linalyl acetate                                    | 6.03      | 14.18     | 15.11     | 13.51     |
| 10  | 13.457   | Hexanedioic acid, dioctyl ester                    | 5.37      |           |           |           |
| 11  | 13.687   | Caryophyllene                                      | 1.17      | 1.36      | 2.62      | 1.25      |
| 12  | 14.987   | Hexanedioic acid, dioctyl ester (izomer)           | 8.55      | 0.31      | 0.40      | 0.32      |
| 13  | 15.703   | Alpha-bisabolol                                    | 1.01      | 1.27      | 1.15      | 1.29      |
| 14  | 15.968   | Hexanedioic acid, dioctyl ester (izomer)           | 8.66      |           |           |           |
| 15  | 16.498   | Hexanedioic acid, dioctyl ester (izomer)           | 2.03      | 0.70      |           |           |
| 16  | 16.708   | Phthalic acid, butyl undecyl ester                 | 0.87      |           |           |           |
| 17  | 17.018   | Hexanedioic acid, dioctyl ester (izomer)           | 4.59      |           |           |           |
| 18  | 17.543   | Hexanedioic acid, dioctyl ester (izomer)           | 3.46      |           |           |           |
| 19  | 17.849   | Dibutyl phthalate                                  | 1.47      | 1.02      | 0.98      | 0.82      |
| 20  | 18.044   | Hexanedioic acid, dioctyl ester (izomer)           | 6.02      | 0.24      |           |           |
| 21  | 20.53    | Hexanedioic acid, dioctyl ester (izomer)           | 9.20      |           |           |           |
| 22  | 21.03    | Hexanedioic acid, dioctyl ester (izomer)           | 3.01      |           |           |           |
| 23  | 22.931   | Hexanedioic acid, dioctyl ester (izomer)           | 2.44      |           |           |           |
| 24  | 23.401   | Hexanedioic acid, dioctyl ester (izomer)           | 4.54      |           |           |           |
| 25  | 24.081   | Heptadecane, 2,6,10,14-tetramethyl                 | 1.39      |           |           |           |

## Bibliography

1. Comparison of different extraction methods of essential oils from *Lavandula Angustifolia* and detection of target compounds with UPLC-MS/MS , Madalina Marc, Manuela Mincea, Vasile Ostafe, Former: NEW FRONT. CHEM. (2016), Vol. 25, Number 2, pp. 83-94.
2. Study on Lavender Essential Oil Chemical Compositions by GC-MS and Improved pGC, Maitinuer Maiwulanjiang, Guangyao Dong, Xiaohui Bai, Aoken Aimila, Haji Akber Aisa, Molecules 2020, 25, 3166, 8 pp.
3. C haracterisation of lavender essential oils by using gas chromatography–mass spectrometry with correlation of linear a retention indices and comparison with comprehensive two-dimensional gas chromatography, Robert Shellie , Luigi Mondello , Philip Marriott , Giovanni Dugo, Journal of Chromatography A, 1 (2000) , 10 pp.
